# Supplementary material for: Chemical Composition, In Vitro Bioaccessibility and Antioxidant Activity of Polyphenolic Compounds from Nutraceutical Fennel Waste Extract
Source: MDPI journal article supplement (doi:10.3390/molecules26071968), 2021-03-31
Supplement: s1 [file s1]

## Supplementary materials:

**Table S1.** Correlation between TPC and data obtained by the DPPH, ABTS, and FRAP tests. The correlation coefficients were evaluated by using Pearson's method.

| Assay | Gastric Stage | Duodenal Stage | Pronase Stage | Viscozyme Stage |
|-------|---------------|----------------|---------------|-----------------|
|       | $R^2$         | $R^2$          | $R^2$         | $R^2$           |
| DPPH  | 0.99          | 0.99           | 0.98          | 0.99            |
| ABTS  | 0.98          | 0.98           | 0.99          | 0.99            |
| FRAP  | 0.98          | 0.98           | 0.98          | 0.98            |

**Table S2.** Stock solutions composition

| Salt solution                                     | Stock concentration (mol/L) | SSF (pH 7)                              |                                             | SGF (pH 3)                              |                                     | SIF (pH 7)                              |                                     |
|---------------------------------------------------|-----------------------------|-----------------------------------------|---------------------------------------------|-----------------------------------------|-------------------------------------|-----------------------------------------|-------------------------------------|
|                                                   |                             | mL of Stock added to prepare 0.4 L (mL) | Final salt concentration in sample (mmol/L) | mL of Stock added to prepare 0.4 L (mL) | Final salt conc. in sample (mmol/L) | mL of Stock added to prepare 0.4 L (mL) | Final salt conc. in sample (mmol/L) |
| KCl                                               | 0.5                         | 15.1                                    | 15.1                                        | 6.9                                     | 6.9                                 | 6.8                                     | 6.8                                 |
| KH <sub>2</sub> PO <sub>4</sub>                   | 0.5                         | 3.7                                     | 1.35                                        | 0.9                                     | 0.9                                 | 0.8                                     | 0.8                                 |
| NaHCO <sub>3</sub>                                | 1                           | 6.8                                     | 13.68                                       | 12.5                                    | 25                                  | 42.5                                    | 85                                  |
| NaCl                                              | 2                           | -                                       | -                                           | 11.8                                    | 47.2                                | 9.6                                     | 38.4                                |
| MgCl <sub>2</sub> (H <sub>2</sub> O) <sub>6</sub> | 0.15                        | 0.5                                     | 0.15                                        | 0.4                                     | 0.12                                | 1.1                                     | 0.33                                |
| NH <sub>4</sub> (CO <sub>3</sub> ) <sub>2</sub>   | 0.5                         | 0.06                                    | 0.06                                        | 0.5                                     | 0.5                                 | -                                       | -                                   |

SSF: simulated salivary fluid; SGF: simulated gastric fluid gastric; SIF: simulated intestinal fluid.
